# Supplementary material for: Cortical Sensitivity to Visual Features in Natural Scenes
Source: PLOS journal article supplement (doi:10.1371/journal.pbio.0030342), 2005-09-19
Supplement: S1 (10.1371/journal.pbio.0030342.s001) [file journal.pbio.0030342.s001]

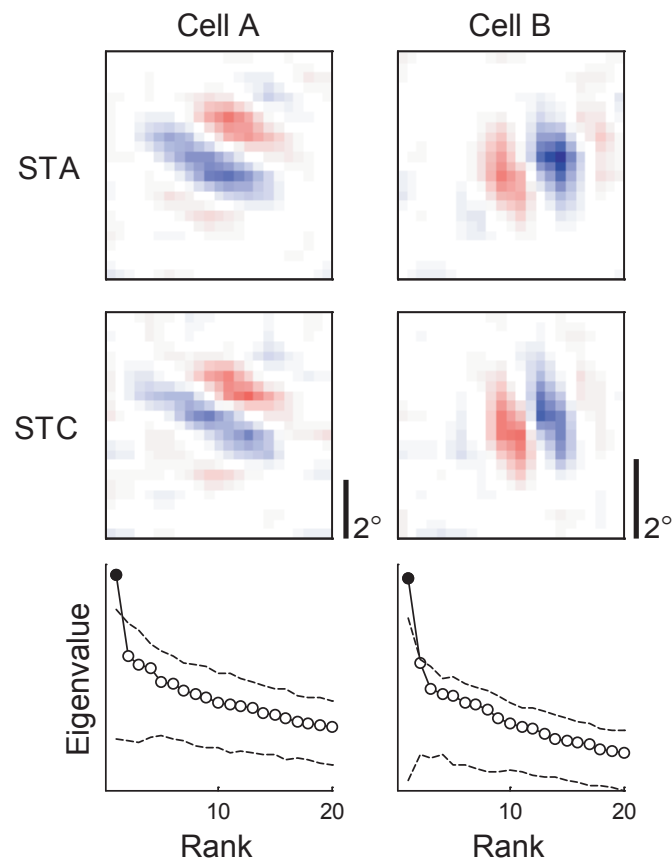

**Supplementary Figure 1.** Comparison between STA and significant eigenvector of STC for simple cells. Results from two cells are shown. Upper, STA. Middle, STC eigenvector. Lower, STC eigenvalues, as in Fig1B.
