# Supplementary material for: Cortical Sensitivity to Visual Features in Natural Scenes
Source: PLOS journal article supplement (doi:10.1371/journal.pbio.0030342), 2005-09-19
Supplement: S2 (10.1371/journal.pbio.0030342.s002) [file journal.pbio.0030342.s002]

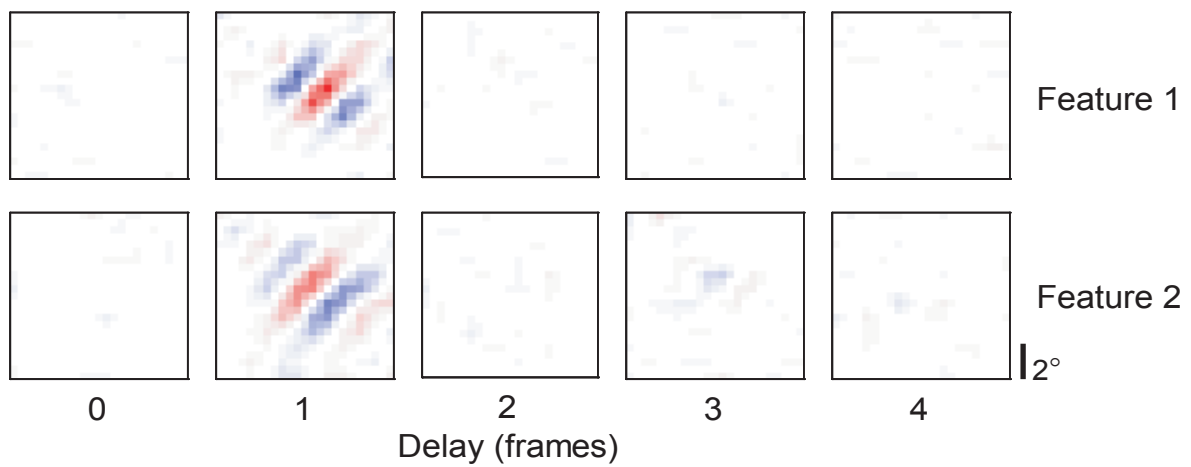

**Supplementary Figure 2** Estimated spatiotemporal features of a complex cell. Note that the signals in the features are almost completely contained in the spatial feature at a delay of 1 frame.
